# Supplementary material for: Changes in Triacylglycerols Content and Quality Control Implications of Coix Seeds during Processing and Storage
Source: MDPI journal article supplement (doi:10.3390/foods11162462), 2022-08-15
Supplement: s1 [file s1]

## Supplementary materials

### Changes in triacylglycerols content and quality control implications of Coix Seeds during processing and storage

Weiwei Tang<sup>a,#</sup>, Jiancheng Wang<sup>a,#</sup>, Wei Li<sup>a</sup>, Chaojun Zhang<sup>b</sup>, Bin Li<sup>a</sup>, Ping Li<sup>a,\*</sup>,  
Jun Chen<sup>c,\*</sup>

<sup>a</sup> *State Key Laboratory of Natural Medicines, China Pharmaceutical University,  
Nanjing, Jiangsu 210009, P. R. China*

<sup>b</sup>*Zhejiang Kanglaite Pharmaceutical Co. Ltd, Hangzhou, Zhejiang 310018, P. R.  
China*

<sup>c</sup>*Department of Pharmacognosy, School of Traditional Chinese Pharmacy, China  
Pharmaceutical University, Nanjing, Jiangsu 211198, P. R. China*

\*Correspondence: liping@cpu.edu.cn (P.L.); 1020060894@cpu.edu.cn (J.C.)

<sup>#</sup>These authors contributed equally to this work.

## Content

Table S1: Geographical origins of 83 batches of coix seed;

Table S2: The conversion factors of the seven analytes;

Table S3: Triacylglycerols identified in coix seed by UHPLC-Q-TOF-MS;

Table S4: Diacylglycerols identified in coix seed by UHPLC-Q-TOF-MS;

Table S5: Phosphatidylcholines identified in coix seed by UHPLC-Q-TOF-MS;

Table S6: Fatty acids identified in coix seed by UHPLC-Q-TOF-MS;

Figure S1: Fragmentation pattern of lipids compounds;

Table S7: The seven molecular species of TG contents from 77 batches of coix seed (from YC-01 to YC-77);

Table S8: The rate of decline in the content of coix seed and coix seed powder;

Table S9: The calibration curves, linear range, limit of detection (LOD) and limit of quantification (LOQ) of the aflatoxins and zearalenone;

Table S10: Contents of aflatoxin and zearalenone in 24 batches of coix seed.

Table S1 Geographical origins of 83 batches of coix seed

| No.   | Origins            | No.   | Origins          | No.   | Origins          |
|-------|--------------------|-------|------------------|-------|------------------|
| YC-01 | Huilong, Guizhou   | YC-29 | Yaozhai, Fujian  | YC-57 | Lugu, Yunnan     |
| YC-02 | Xiashan, Guizhou   | YC-30 | Dongkeng, Fujian | YC-58 | Bangbie, Yunnan  |
| YC-03 | Baling, Guizhou    | YC-31 | Lichu, Fujian    | YC-59 | Sheli, Yunnan    |
| YC-04 | Tunjiao, Guizhou   | YC-32 | Miaowan, Fujian  | YC-60 | Xinzhu, Yunnan   |
| YC-05 | Lehe, Guizhou      | YC-33 | Maochu, Fujian   | YC-61 | Lubuli, Yunnan   |
| YC-06 | Sanhe, Guizhou     | YC-34 | Yuanling, Fujian | YC-62 | Bianliao, Yunnan |
| YC-07 | Poliu, Guizhou     | YC-35 | Dongyang, Fujian | YC-63 | Kebai, Yunnan    |
| YC-08 | Longchang, Guizhou | YC-36 | Hecun, Fujian    | YC-64 | Goujie, Yunnan   |
| YC-09 | Gaoliang, Yunnan   | YC-37 | Lichu, Fujian    | YC-65 | Niuwei, Yunnan   |

|       |                        |       |                       |       |                   |
|-------|------------------------|-------|-----------------------|-------|-------------------|
| YC-10 | Wulong, Yunnan         | YC-38 | Jinfengcun, Fujian    | YC-66 | Cunqiao, Fujian   |
| YC-11 | Dongzhuang, Zhejiang   | YC-39 | Nongchang, Jiangxi    | YC-67 | Yantang, Fujian   |
| YC-12 | Liuzhai, Zhejiang      | YC-40 | Liaohua, Jiangxi      | YC-68 | Meikeng, Fujian   |
| YC-13 | Xiaochi, Zhejiang      | YC-41 | Zhangqing, Jiangxi    | YC-69 | Jiuguan, Fujian   |
| YC-14 | Zhouling, Zhejiang     | YC-42 | Shizi, Guizhou        | YC-70 | Wangcun, Fujian   |
| YC-15 | Wengdi, Zhejiang       | YC-43 | Labi, Guizhou         | YC-71 | Dongyang, Fujian  |
| YC-16 | Houzhanggang, Zhejiang | YC-44 | Ganlongdong, Guizhou  | YC-72 | Lichu, Fujian     |
| YC-17 | Yanshan, Zhejiang      | YC-45 | Xintian, Guizhou      | YC-73 | Yaozhai, Fujian   |
| YC-18 | Cangyang, Zhejiang     | YC-46 | Dapu, Guizhou         | YC-74 | Maochu, Fujian    |
| YC-19 | Shuangsheng, Zhejiang  | YC-47 | Xiaopingzhai, Guizhou | YC-75 | Hecun, Fujian     |
| YC-20 | Tulin, Zhejiang        | YC-48 | Dianmu, Guizhou       | YC-76 | Lishi, Fujian     |
| YC-21 | Xinpan, Zhejiang       | YC-49 | Bashang, Guizhou      | YC-77 | Lingling, Fujian  |
| YC-22 | Wangcun, Fujian        | YC-50 | Shuanglong, Guizhou   | YC-78 | Taishun, Zhejiang |
| YC-23 | Gaomen, Fujian         | YC-51 | Yangzhai, Guizhou     | YC-79 | Pucheng, Fujian   |
| YC-24 | Jiumu, Fujian          | YC-52 | Bangjie, Guizhou      | YC-80 | Shizong, Yunnan   |
| YC-25 | Huayuan, Fujian        | YC-53 | Huangtula, Guizhou    | YC-81 | Dongkeng, Fujian  |
| YC-26 | Zhongxinyuanli, Fujian | YC-54 | Bianlin, Yunnan       | YC-82 | Hecun, Fujian     |
| YC-27 | Guanlu, Fujian         | YC-55 | Tianfang, Yunnan      | YC-83 | Yaozhai, Fujian   |
| YC-28 | Shipo, Fujian          | YC-56 | Yuxua, Yunnan         |       |                   |

Table S2 The conversion factors of the seven analytes

| Analytes | $F_i$ | RSD(%) |
|----------|-------|--------|
| LLL      | 0.94  | 1.58   |
| LLP      | 0.97  | 1.38   |
| LLO      | 1.04  | 0.35   |
| POL      | 0.95  | 1.38   |
| OOL      | 1.06  | 0.60   |
| OOP      | 0.97  | 0.91   |
| OOO      | 1     | 0.60   |

Table S3 Triacylglycerols identified in coix seed by UHPLC-Q-TOF-MS.

| No.  | RT (min) | Precursor ion(m/z)<br>[M+NH <sub>4</sub> ] <sup>+</sup> | Molecular formula                               | Error (ppm) | MS/MS fragmentation (m/z)                                                                          | Identification |
|------|----------|---------------------------------------------------------|-------------------------------------------------|-------------|----------------------------------------------------------------------------------------------------|----------------|
| T1   | 50.563   | 894.7563                                                | C <sub>57</sub> H <sub>96</sub> O <sub>6</sub>  | -2.03       | 877.7286, 599.5057, 597.4910, 337.2781, 261.2186                                                   | TAG:LLLn       |
| T2   | 50.995   | 870.7578                                                | C <sub>55</sub> H <sub>96</sub> O <sub>6</sub>  | -3.85       | 853.7187, 597.4897, 573.4859, 337.2687, 313.2728, 261.9244                                         | TAG:LLnP       |
| T3*  | 51.297   | 896.7734                                                | C <sub>57</sub> H <sub>98</sub> O <sub>6</sub>  | -3.68       | 879.7475, 861.7322, 599.5047, 337.2747, 319.2451, 263.2371, 245.2094                               | TAG:LLL        |
| T4   | 51.887   | 846.7574                                                | C <sub>53</sub> H <sub>96</sub> O <sub>6</sub>  | -3.84       | 573.4862, 549.4857                                                                                 | TAG:PoPL       |
| T5*  | 52.015   | 872.7729                                                | C <sub>55</sub> H <sub>98</sub> O <sub>6</sub>  | -3.2        | 855.7456, 599.5043, 575.5042, 337.2751, 313.2714, 263.2369                                         | TAG:LLP        |
| T6*  | 52.515   | 898.7892                                                | C <sub>57</sub> H <sub>100</sub> O <sub>6</sub> | -3.84       | 881.7589, 601.5191, 599.5047, 339.2886, 337.2746, 263.2375, 245.2263                               | TAG:LLO        |
| T7   | 52.799   | 848.7724                                                | C <sub>53</sub> H <sub>98</sub> O <sub>6</sub>  | -2.69       | 831.7462, 575.5047, 551.5041, 337.2790, 313.2732, 263.2362                                         | TAG:PPL        |
| T8*  | 53.349   | 874.7888                                                | C <sub>55</sub> H <sub>100</sub> O <sub>6</sub> | -3.48       | 857.7642, 601.5193, 577.5182, 575.5044, 339.2877, 313.2742, 263.2381, 239.2346                     | TAG:POL        |
| T9*  | 53.917   | 900.8043                                                | C <sub>57</sub> H <sub>102</sub> O <sub>6</sub> | -3.21       | 883.7754, 603.5331, 601.5188, 339.2895, 263.2355, 245.2261                                         | TAG:OOL        |
| T10  | 54.284   | 850.7877                                                | C <sub>53</sub> H <sub>100</sub> O <sub>6</sub> | -3.34       | 833.7562, 577.5194, 551.5038, 339.2928, 313.2752, 265.2576, 239.2388                               | TAG:PPO        |
| T11* | 54.984   | 876.8042                                                | C <sub>55</sub> H <sub>102</sub> O <sub>6</sub> | -3.18       | 859.7768, 603.5349, 577.5190, 339.2891, 313.2772, 265.2522, 239.2362                               | TAG:OOP        |
| T12* | 55.652   | 902.8211                                                | C <sub>57</sub> H <sub>104</sub> O <sub>6</sub> | -4.5        | 885.7879, 603.5342, 339.2891, 321.2786, 265.2513, 247.2411                                         | TAG:OOO        |
| T13  | 56.152   | 928.8340                                                | C <sub>59</sub> H <sub>106</sub> O <sub>6</sub> | -1.35       | 911.7728, 631.5640, 599.5117, 369.3368, 337.2676, 263.2216, 265.2576                               | TAG:ALL        |
| T14  | 56.636   | 878.8193                                                | C <sub>55</sub> H <sub>104</sub> O <sub>6</sub> | -2.54       | 861.7831, 605.5456, 579.5308, 577.5141, 341.3021, 339.2894, 313.2613, 267.2752, 265.2478, 239.1341 | TAG:POS        |
| T15  | 57.453   | 904.8352                                                | C <sub>57</sub> H <sub>106</sub> O <sub>6</sub> | -2.74       | 887.7946, 631.5722, 605.5434, 575.5054, 339.2891, 265.2490                                         | TAG:POA        |
| T16  | 58.288   | 930.8506                                                | C <sub>59</sub> H <sub>108</sub> O <sub>6</sub> | -2.39       | 913.7981, 631.5649, 601.5188, 369.3368, 339.2891, 263.2375                                         | TAG:ALO        |

|     |        |          |                                                 |       |                                                                      |         |
|-----|--------|----------|-------------------------------------------------|-------|----------------------------------------------------------------------|---------|
| T17 | 59.706 | 906.8484 | C <sub>57</sub> H <sub>108</sub> O <sub>6</sub> | 0.02  | 633.5834, 607.5769, 577.5260, 369.3369, 339.2891, 313.2631, 265.2478 | TAG:AOP |
| T18 | 60.840 | 932.8618 | C <sub>59</sub> H <sub>110</sub> O <sub>6</sub> | -0.36 | 633.5783, 603.5311, 369.3318, 339.2891, 265.2478                     | TAG:AOO |

A: arachidic acyl; Po:palmitoleic acyl; Rn:ricinoleic acyl; Ln:Linolenic acyl; L:linoleic acyl; O:oleic acyl; P:palmitic acyl; S:stearic acyl; TAG: LLP indicates that the three fatty acyl chains of triacylglycerol are linoleic acyl, linoleic acyl, and palmitic acyl respectively. \* Structures confirmed by comparison with the reference standards.

Table S4 Diacylglycerols identified in coix seed by UHPLC-Q-TOF-MS.

| No. | RT (min) | Precursor ion m/z<br>[M+Na] <sup>+</sup> | Molecular formula                              | Error (ppm) | MS/MS fragmentation                              | Identification |
|-----|----------|------------------------------------------|------------------------------------------------|-------------|--------------------------------------------------|----------------|
| D1  | 44.195   | 639.4975                                 | C <sub>39</sub> H <sub>68</sub> O <sub>5</sub> | -2.92       | 617.5152, 599.5016, 337.2727, 263.2364           | DAG:LL         |
| D2  | 44.472   | 615.4967                                 | C <sub>37</sub> H <sub>68</sub> O <sub>5</sub> | -3.71       | 593.5151, 575.5066, 337.2734, 313.2735, 263.2358 | DAG:LP         |
| D3  | 44.858   | 641.5127                                 | C <sub>39</sub> H <sub>70</sub> O <sub>5</sub> | -4.44       | 619.5305, 601.5201, 339.2898, 337.2743, 263.2408 | DAG:OL         |
| D4  | 45.258   | 617.5132                                 | C <sub>37</sub> H <sub>70</sub> O <sub>5</sub> | -2.77       | 595.5309, 577.5202, 339.2833, 313.2776           | DAG:PO         |
| D5  | 45.575   | 643.5274                                 | C <sub>39</sub> H <sub>72</sub> O <sub>5</sub> | -2.74       | 621.5503, 603.5343, 339.2898, 265.2537           | DAG:OO         |
| D6  | 45.925   | 619.5286                                 | C <sub>37</sub> H <sub>72</sub> O <sub>5</sub> | -1.38       | 313.2668                                         | DAG:PS         |
| D7  | 46.157   | 645.5458                                 | C <sub>39</sub> H <sub>74</sub> O <sub>5</sub> | -2.97       | 341.3038                                         | DAG:OS         |

DAG:PL indicates that the two fatty acyl chains of the diacylglycerol are palmitic acyl and linoleic acyl, respectively.

Table S5 Phosphatidylcholines identified in coix seed by UHPLC-Q-TOF-MS.

| No. | RT (min) | Precursor ion m/z<br>[M+H] <sup>+</sup> | Molecular formula                                 | Error (ppm) | MS/MS fragmentation                                        | Identification |
|-----|----------|-----------------------------------------|---------------------------------------------------|-------------|------------------------------------------------------------|----------------|
| P1  | 41.995   | 780.5562                                | C <sub>44</sub> H <sub>78</sub> NO <sub>8</sub> P | -2.92       | 597.4807, 520.3347, 502.3081, 184.0721, 166.0660, 125.9858 | PC: LLn        |
| P2  | 42.506   | 756.5557                                | C <sub>42</sub> H <sub>78</sub> NO <sub>8</sub> P | -3.71       | 496.3363, 478.3266, 184.0725, 166.0654, 125.9836           | PC: PLn        |
| P3  | 42.689   | 782.5721                                | C <sub>44</sub> H <sub>80</sub> NO <sub>8</sub> P | -4.44       | 559.4995, 520.3348, 502.3234, 184.0729, 166.0631, 125.9868 | PC: LL         |

|    |        |          |                                                   |       |                              |                                         |        |
|----|--------|----------|---------------------------------------------------|-------|------------------------------|-----------------------------------------|--------|
| P4 | 43.122 | 758.5722 | C <sub>42</sub> H <sub>80</sub> NO <sub>8</sub> P | -2.77 | 575.5285, 184.0754, 125.9758 | 520.3342, 502.3276, 496.3369, 478.3248, | PC: LP |
| P5 | 43.523 | 784.5883 | C <sub>44</sub> H <sub>82</sub> NO <sub>8</sub> P | -2.74 | 601.5093, 166.0612, 125.9814 | 522.3549, 520.3324, 502.2083, 184.0733, | PC: OL |
| P6 | 44.090 | 760.5884 | C <sub>42</sub> H <sub>83</sub> NO <sub>8</sub> P | -1.38 | 577.5055, 166.0664, 125.9834 | 504.3357, 496.3372, 478.3271, 184.0718, | PC: PO |
| P7 | 44.290 | 786.6043 | C <sub>44</sub> H <sub>84</sub> NO <sub>8</sub> P | -2.97 | 603.5633, 166.0674, 125.9852 | 524.3882, 520.3365, 502.3224, 184.0725, | PC: SL |

PL: LP indicates that the two fatty acyl chains of the phosphatidylcholine are palmitic acyl and linoleic acyl, respectively.

Table S6 Fatty acids identified in coix seed by UHPLC-Q-TOF-MS.

| No.  | RT (min) | Identification | Molecular formular                             | Precusor ion m/z [M-H] <sup>-</sup> | Error (ppm) |
|------|----------|----------------|------------------------------------------------|-------------------------------------|-------------|
| F1   | 25.411   | FA:C18:2 ,OH   | C <sub>18</sub> H <sub>32</sub> O <sub>3</sub> | 295.2270                            | 2.93        |
| F2   | 25.661   | FA:C18:2 ,OH   | C <sub>18</sub> H <sub>32</sub> O <sub>3</sub> | 295.2285                            | -2.13       |
| F3   | 26.178   | FA:C18:2 ,OH   | C <sub>18</sub> H <sub>32</sub> O <sub>3</sub> | 295.2391                            | -4.16       |
| F4   | 27.363   | FA:Rn          | C <sub>18</sub> H <sub>34</sub> O <sub>3</sub> | 297.2473                            | 3.75        |
| F5   | 29.348   | FA:Ln          | C <sub>18</sub> H <sub>30</sub> O <sub>2</sub> | 277.2176                            | -1.06       |
| F6*  | 30.966   | FA:L           | C <sub>18</sub> H <sub>32</sub> O <sub>2</sub> | 279.2368                            | -3.38       |
| F7*  | 31.784   | FA:P           | C <sub>16</sub> H <sub>32</sub> O <sub>2</sub> | 255.2341                            | -4.47       |
| F8   | 32.134   | FA:B           | C <sub>22</sub> H <sub>44</sub> O <sub>2</sub> | 339.2380                            | -8.95       |
| F9*  | 32.735   | FA:O           | C <sub>18</sub> H <sub>34</sub> O <sub>2</sub> | 281.2497                            | -3.88       |
| F10* | 34.636   | FA:S           | C <sub>18</sub> H <sub>36</sub> O <sub>2</sub> | 283.2652                            | -3.33       |

C18 : 2 ,OH:Hydroxy octadecadienoic acid; Rn:ricinoleic acid; Ln:Linolenic acid; L:linoleic acid; O:oleic acid; P:palmitic acid; B:behenic acid; S:stearic acid.

\* Structures confirmed by comparison with reference standards.

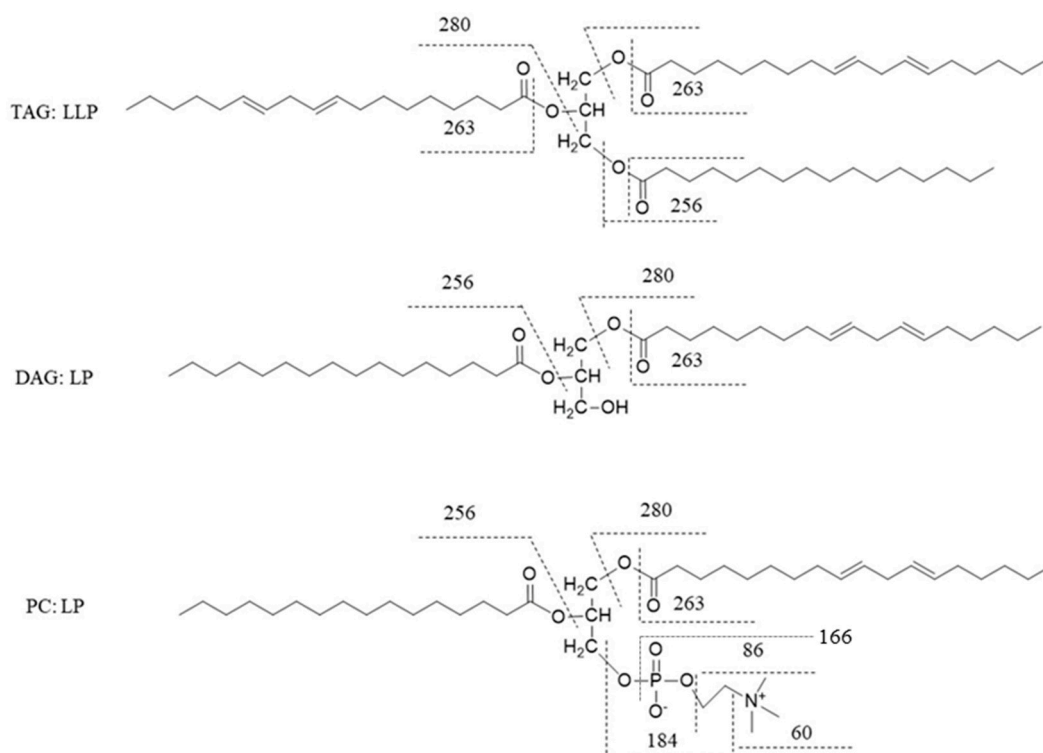

Figure S1 Fragmentation pattern of lipids compounds.

Table S7 The seven molecular species of TG contents from 77 batches of coix seed (from YC-01 to YC-77)

| NO.   | LLL(%) | LLP(%) | LLO(%) | POL(%) | OOL(%) | OOP(%) | OOO(%) | Total(%) |
|-------|--------|--------|--------|--------|--------|--------|--------|----------|
| YC-01 | 0.15   | 0.21   | 0.48   | 0.35   | 0.54   | 0.30   | 0.56   | 2.59     |
| YC-02 | 0.17   | 0.26   | 0.62   | 0.46   | 0.67   | 0.41   | 0.61   | 3.19     |
| YC-03 | 0.18   | 0.28   | 0.65   | 0.47   | 0.70   | 0.41   | 0.64   | 3.33     |
| YC-04 | 0.13   | 0.19   | 0.39   | 0.29   | 0.41   | 0.25   | 0.38   | 2.03     |
| YC-05 | 0.31   | 0.49   | 1.35   | 0.89   | 1.46   | 0.69   | 1.25   | 6.44     |
| YC-06 | 0.35   | 0.68   | 1.47   | 1.04   | 1.67   | 0.86   | 1.47   | 7.54     |
| YC-07 | 0.34   | 0.54   | 1.41   | 1.02   | 1.47   | 0.80   | 1.25   | 6.83     |
| YC-08 | 0.28   | 0.44   | 1.17   | 0.80   | 1.27   | 0.66   | 1.11   | 5.73     |
| YC-09 | 0.20   | 0.30   | 0.77   | 0.54   | 0.79   | 0.49   | 0.78   | 3.86     |
| YC-10 | 0.21   | 0.35   | 0.93   | 0.64   | 1.00   | 0.57   | 0.96   | 4.66     |
| YC-11 | 0.36   | 0.48   | 1.15   | 0.80   | 1.18   | 0.60   | 0.95   | 5.52     |
| YC-12 | 0.35   | 0.43   | 1.02   | 0.68   | 1.00   | 0.51   | 0.80   | 4.78     |

|       |      |      |      |      |      |      |      |      |
|-------|------|------|------|------|------|------|------|------|
| YC-13 | 0.40 | 0.51 | 1.21 | 0.77 | 1.17 | 0.51 | 0.85 | 5.42 |
| YC-14 | 0.36 | 0.47 | 1.18 | 0.80 | 1.23 | 0.58 | 0.99 | 5.61 |
| YC-15 | 0.36 | 0.46 | 1.15 | 0.79 | 1.25 | 0.61 | 1.02 | 5.64 |
| YC-16 | 0.35 | 0.42 | 1.02 | 0.68 | 1.03 | 0.51 | 0.82 | 4.83 |
| YC-17 | 0.36 | 0.46 | 1.15 | 0.77 | 1.18 | 0.58 | 0.96 | 5.47 |
| YC-18 | 0.28 | 0.35 | 0.95 | 0.62 | 0.97 | 0.45 | 0.77 | 4.39 |
| YC-19 | 0.24 | 0.28 | 0.78 | 0.52 | 0.81 | 0.37 | 0.60 | 3.60 |
| YC-20 | 0.34 | 0.43 | 1.10 | 0.72 | 1.07 | 0.51 | 0.85 | 5.01 |
| YC-21 | 0.28 | 0.38 | 1.01 | 0.65 | 1.05 | 0.47 | 0.83 | 4.67 |
| YC-22 | 0.22 | 0.30 | 0.77 | 0.53 | 0.78 | 0.42 | 0.67 | 3.67 |
| YC-23 | 0.23 | 0.33 | 0.82 | 0.57 | 0.84 | 0.44 | 0.70 | 3.92 |
| YC-24 | 0.24 | 0.30 | 0.81 | 0.56 | 0.81 | 0.45 | 0.70 | 3.87 |
| YC-25 | 0.15 | 0.19 | 0.42 | 0.28 | 0.42 | 0.23 | 0.36 | 2.04 |
| YC-26 | 0.25 | 0.36 | 0.89 | 0.61 | 0.62 | 0.48 | 0.77 | 3.98 |
| YC-27 | 0.14 | 0.18 | 0.42 | 0.29 | 0.46 | 0.21 | 0.33 | 2.03 |
| YC-28 | 0.28 | 0.38 | 0.62 | 0.64 | 0.90 | 0.50 | 0.72 | 4.02 |
| YC-29 | 0.28 | 0.37 | 0.92 | 0.63 | 0.90 | 0.49 | 0.75 | 4.33 |
| YC-30 | 0.28 | 0.35 | 0.95 | 0.62 | 0.97 | 0.45 | 0.77 | 4.39 |
| YC-31 | 0.32 | 0.45 | 1.20 | 0.82 | 1.23 | 0.63 | 1.04 | 5.68 |
| YC-32 | 0.24 | 0.32 | 0.83 | 0.57 | 0.83 | 0.45 | 0.71 | 3.94 |
| YC-33 | 0.26 | 0.35 | 0.90 | 0.68 | 0.97 | 0.50 | 0.81 | 4.47 |
| YC-34 | 0.33 | 0.44 | 1.08 | 0.73 | 1.04 | 0.56 | 0.82 | 5.00 |
| YC-35 | 0.33 | 0.42 | 1.10 | 0.70 | 1.05 | 0.51 | 0.81 | 4.92 |
| YC-36 | 0.34 | 0.45 | 1.09 | 0.76 | 1.06 | 0.56 | 0.86 | 5.12 |
| YC-37 | 0.28 | 0.36 | 1.01 | 0.58 | 0.96 | 0.42 | 0.69 | 4.30 |
| YC-38 | 0.36 | 0.48 | 1.20 | 0.82 | 1.14 | 0.59 | 0.91 | 5.50 |
| YC-39 | 0.24 | 0.33 | 0.78 | 0.55 | 0.79 | 0.42 | 0.65 | 3.76 |
| YC-40 | 0.26 | 0.36 | 0.90 | 0.61 | 0.91 | 0.45 | 0.74 | 4.23 |
| YC-41 | 0.23 | 0.26 | 0.68 | 0.46 | 0.76 | 0.29 | 0.48 | 3.16 |
| YC-42 | 0.22 | 0.36 | 1.08 | 0.66 | 1.08 | 0.45 | 0.80 | 4.65 |
| YC-43 | 0.26 | 0.36 | 1.09 | 0.54 | 1.09 | 0.32 | 0.81 | 4.48 |
| YC-44 | 0.22 | 0.34 | 1.01 | 0.54 | 1.02 | 0.33 | 0.81 | 4.27 |
| YC-45 | 0.30 | 0.30 | 0.95 | 0.47 | 0.97 | 0.28 | 0.77 | 4.05 |
| YC-46 | 0.20 | 0.32 | 0.89 | 0.53 | 0.91 | 0.35 | 0.73 | 3.93 |
| YC-47 | 0.22 | 0.34 | 1.02 | 0.57 | 1.05 | 0.36 | 0.85 | 4.40 |
| YC-48 | 0.22 | 0.34 | 1.02 | 0.58 | 1.04 | 0.37 | 0.82 | 4.39 |
| YC-49 | 0.25 | 0.39 | 1.19 | 0.66 | 1.20 | 0.42 | 0.94 | 5.05 |
| YC-50 | 0.21 | 0.34 | 1.00 | 0.58 | 1.00 | 0.38 | 0.77 | 4.29 |
| YC-51 | 0.16 | 0.27 | 0.69 | 0.48 | 0.72 | 0.36 | 0.61 | 3.29 |
| YC-52 | 0.22 | 0.35 | 0.94 | 0.64 | 0.97 | 0.49 | 0.75 | 4.35 |
| YC-53 | 0.23 | 0.41 | 1.14 | 0.82 | 1.25 | 0.67 | 1.11 | 5.63 |
| YC-54 | 0.19 | 0.30 | 0.72 | 0.50 | 0.74 | 0.39 | 0.64 | 3.49 |
| YC-55 | 0.22 | 0.37 | 0.95 | 0.69 | 1.06 | 0.59 | 1.00 | 4.89 |
| YC-56 | 0.22 | 0.34 | 0.86 | 0.61 | 0.91 | 0.51 | 0.84 | 4.29 |



|       |      |      |      |      |      |      |      |      |
|-------|------|------|------|------|------|------|------|------|
| YC-57 | 0.32 | 0.47 | 1.16 | 0.78 | 1.08 | 0.60 | 0.94 | 5.35 |
| YC-58 | 0.27 | 0.41 | 1.00 | 0.72 | 1.01 | 0.61 | 0.93 | 4.96 |
| YC-59 | 0.30 | 0.45 | 1.12 | 0.78 | 1.12 | 0.64 | 0.99 | 5.39 |
| YC-60 | 0.24 | 0.37 | 0.93 | 0.67 | 0.99 | 0.56 | 0.90 | 4.66 |
| YC-61 | 0.21 | 0.34 | 0.80 | 0.57 | 0.84 | 0.48 | 0.77 | 4.00 |
| YC-62 | 0.19 | 0.32 | 0.80 | 0.57 | 0.85 | 0.48 | 0.79 | 4.00 |
| YC-63 | 0.34 | 0.47 | 1.24 | 0.81 | 1.15 | 0.61 | 0.84 | 5.47 |
| YC-64 | 0.23 | 0.36 | 0.87 | 0.64 | 0.90 | 0.52 | 0.82 | 4.33 |
| YC-65 | 0.22 | 0.35 | 0.87 | 0.62 | 0.91 | 0.52 | 0.83 | 4.32 |
| YC-66 | 0.33 | 0.45 | 1.08 | 0.73 | 1.05 | 0.53 | 0.86 | 5.04 |
| YC-67 | 0.30 | 0.39 | 1.01 | 0.63 | 0.99 | 0.45 | 0.77 | 4.54 |
| YC-68 | 0.28 | 0.37 | 0.93 | 0.60 | 0.92 | 0.44 | 0.73 | 4.27 |
| YC-69 | 0.34 | 0.43 | 1.12 | 0.72 | 1.07 | 0.51 | 0.84 | 5.03 |
| YC-70 | 0.29 | 0.38 | 0.94 | 0.63 | 0.91 | 0.47 | 0.73 | 4.35 |
| YC-71 | 0.27 | 0.36 | 0.95 | 0.58 | 0.87 | 0.41 | 0.64 | 4.06 |
| YC-72 | 0.27 | 0.37 | 0.84 | 0.56 | 0.78 | 0.39 | 0.62 | 3.84 |
| YC-73 | 0.34 | 0.45 | 1.11 | 0.74 | 1.06 | 0.53 | 0.85 | 5.08 |
| YC-74 | 0.27 | 0.38 | 0.92 | 0.58 | 0.90 | 0.40 | 0.68 | 4.13 |
| YC-75 | 0.32 | 0.42 | 1.00 | 0.67 | 0.98 | 0.49 | 0.78 | 4.67 |
| YC-76 | 0.27 | 0.35 | 0.89 | 0.56 | 0.87 | 0.40 | 0.69 | 4.02 |
| YC-77 | 0.38 | 0.51 | 1.19 | 0.84 | 1.16 | 0.65 | 0.97 | 5.70 |

Table S8 The rate of decline in the content of coix seed and coix seed powder.

| Rate of decline<br>(%) | coix seed |       |       | coix seed powder |       |       |
|------------------------|-----------|-------|-------|------------------|-------|-------|
|                        | YC-81     | YC-82 | YC-83 | YC-81            | YC-82 | YC-83 |
| 0-3 month              | 2.03      | 4.86  | 8.29  | 21.72            | 20.79 | 19.60 |
| 3-6 month              | 12.96     | 1.61  | 7.86  | 8.81             | 6.90  | 8.90  |
| 6-9 month              | 22.16     | 24.49 | 20.27 | 38.70            | 34.49 | 35.05 |
| 9-12 month             | 55.00     | 47.06 | 54.71 | 75.27            | 73.60 | 75.20 |

Table S9 The calibration curves, linear range, limit of detection (LOD) and limit of quantification  
(LOQ) of the aflatoxins and zearalenone

| Analytes     | Linearity               | Correlation<br>coefficient (r) | Linear range<br>(ng/mL) | LOQ<br>(ng/mL) | LOD<br>(ng/mL) |
|--------------|-------------------------|--------------------------------|-------------------------|----------------|----------------|
| Aflatoxin G2 | $y = 103416x - 343.229$ | 0.9998                         | 0.12~3                  | 0.07           | 0.013          |
| Aflatoxin G1 | $y = 144101x + 9148.69$ | 0.9994                         | 0.05~10                 | 0.03           | 0.008          |
| Aflatoxin B2 | $y = 140006x - 420.935$ | 0.9999                         | 0.015~3                 | 0.008          | 0.0017         |
| Aflatoxin B1 | $y = 125602x + 5589.50$ | 0.9995                         | 0.05~10                 | 0.04           | 0.006          |
| Zearalenone  | $y = 264074x - 111372$  | 0.9995                         | 1~150                   | 0.095          | 0.015          |

The S10 Contents of aflatoxin and zearalenone in 24 batches of coix seed

| No.   | Aflatoxin G2<br>(μg/kg) | AflatoxinG1<br>(μg/kg) | AflatoxinB2<br>(μg/kg) | AflatoxinB1<br>(μg/kg) | Zearalenone<br>(μg/kg) |
|-------|-------------------------|------------------------|------------------------|------------------------|------------------------|
| YC-01 | ND                      | ND                     | ND                     | ND                     | 114.58                 |
| YC-02 | ND                      | ND                     | ND                     | < 0.08                 | 11.73                  |
| YC-03 | ND                      | ND                     | ND                     | ND                     | 2.7                    |
| YC-04 | ND                      | ND                     | 0.02                   | 0.14                   | 23.9                   |
| YC-05 | ND                      | ND                     | ND                     | ND                     | 26.41                  |
| YC-06 | ND                      | ND                     | ND                     | ND                     | 48.84                  |
| YC-07 | ND                      | ND                     | ND                     | ND                     | 10.92                  |
| YC-08 | ND                      | ND                     | ND                     | ND                     | 37.03                  |
| YC-31 | ND                      | ND                     | ND                     | ND                     | 20.88                  |
| YC-32 | ND                      | ND                     | ND                     | ND                     | 3.79                   |
| YC-33 | ND                      | ND                     | ND                     | ND                     | 2.31                   |
| YC-34 | ND                      | ND                     | ND                     | < 0.08                 | 27.2                   |
| YC-35 | ND                      | ND                     | ND                     | ND                     | 2.41                   |

|       |    |    |        |        |       |
|-------|----|----|--------|--------|-------|
| YC-36 | ND | ND | ND     | ND     | 4.08  |
| YC-37 | ND | ND | DT     | < 0.08 | 9.44  |
| YC-38 | ND | ND | ND     | ND     | 2.88  |
| YC-58 | ND | ND | < 0.03 | ND     | 22.31 |
| YC-59 | ND | ND | ND     | ND     | 24.32 |
| YC-60 | ND | ND | ND     | ND     | 37.71 |
| YC-61 | ND | ND | ND     | ND     | 9.44  |
| YC-62 | ND | ND | ND     | ND     | 28.5  |
| YC-63 | ND | ND | ND     | ND     | 16.99 |
| YC-64 | ND | ND | ND     | ND     | 26.26 |
| YC-65 | ND | ND | ND     | ND     | 2.34  |

<sup>a</sup>ND represents beyond the LOD

<sup>b</sup>DT represents between LOD and LOQ

<sup>c</sup><0.03 or <0.08 represent between LOQ and lowest concentration of linearity
